# Supplementary material
Source: PubMed Central journal article supplement (PMC3319039)
Supplement: NIHMS365397-supplement-Supplemenary_Tables.pdf [file NIHMS365397-supplement-Supplemenary_Tables.pdf]

Table 1S. Scored peptides used to identify proteins by MS using MASCOT. Bold peptides = expectation values (Expect) < 0.05.

| Protein <sup>a</sup> | Accession # | Charge | Ion Score | Expect         | Peptide Sequence                            |
|----------------------|-------------|--------|-----------|----------------|---------------------------------------------|
| Hsc70                | gi 309319   | 2      | <b>34</b> | <b>0.0086</b>  | <b>K.LLQDFFNKG.E</b>                        |
|                      |             | 2      | <b>50</b> | <b>0.0051</b>  | <b>K.DAGTIAGLNVLRI</b>                      |
|                      |             | 2      | <b>53</b> | <b>0.0031</b>  | <b>K.VEIIANDQGNR.T</b>                      |
|                      |             | 2      | <b>40</b> | <b>0.003</b>   | <b>K.MKEIAEAYLGK.T (M oxidation)</b>        |
|                      |             | 2      | 22        | 0.056          | R.ARFEELNADLFR.G                            |
|                      |             | 2      | <b>85</b> | <b>4.9e-08</b> | <b>R.TTPSYVAFTDTER.L</b>                    |
|                      |             | 3      | 4         | 0.98           | K.LLQDFFNKELNK.S                            |
|                      |             | 2      | 16        | 1.3            | K.SFYPEEVSSMVLTK.M (M oxidation)            |
|                      |             | 2      | <b>27</b> | <b>0.038</b>   | <b>K.NQVAMNPTNTVFDKR.R (M oxidation)</b>    |
|                      |             | 3      | <b>70</b> | <b>2.8e-06</b> | <b>R.IINEPTAAAIAYGLDKK.V</b>                |
|                      |             | 3      | <b>63</b> | <b>1.4e-05</b> | <b>K.NQVAMNPTNTVFDKR.L (M oxidation)</b>    |
|                      |             | 3      | <b>66</b> | <b>4.7e-06</b> | <b>K.LDKSQIHDIVLVGGSTR.I</b>                |
| ACSL1                | gi 729927   | 2      | 12        | 0.68           | K.AILDDLLK.L                                |
|                      |             | 2      | 16        | 0.43           | R.MPELIDIR.Q                                |
|                      |             | 2      | <b>68</b> | <b>7.2e-05</b> | <b>K.IGFFQGDRI.L</b>                        |
|                      |             | 2      | <b>45</b> | <b>0.0011</b>  | <b>K.LAQGEYIAPEK.I</b>                      |
|                      |             | 3      | 11        | 1.2            | R.IFGQANTSLKR.W                             |
|                      |             | 2      | <b>48</b> | <b>0.00017</b> | <b>K.VLQPTIFPVVPR.L</b>                     |
|                      |             | 2      | <b>24</b> | <b>0.014</b>   | <b>R.LMITGAAPVSATVLTFLR.T (M oxidation)</b> |
|                      |             | 3      | <b>31</b> | <b>0.0037</b>  | <b>R.TAEALDKDGWLHTGDIGK.W</b>               |
| GP78                 | gi 1304157  | 2      | <b>30</b> | <b>0.029</b>   | <b>R.LTPEEIER.M</b>                         |
|                      |             | 2      | <b>53</b> | <b>0.0031</b>  | <b>R.VEIIANDQGNR.I</b>                      |
|                      |             | 2      | 18        | 0.13           | K.DAGTIAGLNVMRI (M oxidation)               |
|                      |             | 3      | <b>44</b> | <b>0.00052</b> | <b>R.IINEPTAAAIAYGLDKR.E</b>                |
| FMO5                 | gi 3334185  | 2      | 17        | 0.08           | R.WATQVFK.G                                 |
|                      |             | 2      | <b>46</b> | <b>0.016</b>   | <b>R.SGDIGGLWR.F</b>                        |
|                      |             | 2      | <b>43</b> | <b>0.0038</b>  | <b>R.IMYYLSR.I (M oxidation)</b>            |
|                      |             | 3      | 23        | 0.27           | R.FDHEMFGLKPK.H (M oxidation)               |
|                      |             | 2      | <b>60</b> | <b>1.1e-05</b> | <b>R.ASIYQSVVINTSK.E</b>                    |
|                      |             | 3      | <b>40</b> | <b>0.0056</b>  | <b>R.DYKNPVEFTGKR.V</b>                     |
|                      |             | 3      | <b>46</b> | <b>0.00068</b> | <b>R.ALSQHPTVNDLPLNR.I</b>                  |
| Cyp3a11              | gi 6681113  | 2      | <b>37</b> | <b>0.018</b>   | <b>K.DSIEFFKK.F</b>                         |
|                      |             | 2      | <b>70</b> | <b>1.9e-06</b> | <b>R.ALLSPTFTSGK.L</b>                      |
|                      |             | 2      | <b>46</b> | <b>0.00082</b> | <b>K.DVELNGVYIPK.G</b>                      |
|                      |             | 3      | <b>32</b> | <b>0.0066</b>  | <b>K.AISISKDDEWKR.Y</b>                     |
|                      |             | 3      | 20        | 1.4            | R.QGLLQPEKPIVLK.V                           |
|                      |             | 2      | <b>36</b> | <b>0.0027</b>  | <b>K.GSIDPYVYLPFGNGPR.N</b>                 |
|                      |             | 3      | 17        | 0.38           | K.LKEMFPVIEQYGDILVK.Y (M oxidation)         |
| Cyp2d26              | gi 13386414 | 2      | <b>53</b> | <b>0.0022</b>  | <b>R.FSVSTLR.D</b>                          |
|                      |             | 2      | 18        | 0.85           | R.RFSVSTLR.D                                |
|                      |             | 2      | <b>66</b> | <b>9.5e-05</b> | <b>K.LNSFIALVVK.M</b>                       |
|                      |             | 2      | <b>54</b> | <b>0.00014</b> | <b>K.GVILAPYGPEWR.E</b>                     |
|                      |             | 2      | 11        | 0.32           | R.RFEYEDPFFNR.M                             |
|                      |             | 3      | <b>24</b> | <b>0.019</b>   | <b>R.VHQEIDEVIGHVR.H</b>                    |

|           |              |   |    |         |                                 |
|-----------|--------------|---|----|---------|---------------------------------|
|           |              | 3 | 50 | 0.00025 | R.MPYTNAVIHEVQR.F (M oxidation) |
| UGT1      | gi 436187    | 2 | 64 | 0.0002  | R.IPQTVLWR.Y                    |
| Cyp2d10   | gi 387141    | 2 | 53 | 0.0022  | R.FSVSTLR.N                     |
|           |              | 2 | 24 | 0.85    | R.RFSVSTLR.N                    |
|           |              | 2 | 13 | 0.94    | K.KSLEDWVTK.E                   |
|           |              | 2 | 70 | 1.9e-05 | R.FGDIAPLNLPR.I                 |
|           |              | 2 | 18 | 0.85    | R.DIEVQDFLIPK.G                 |
|           |              | 2 | 72 | 3.4e-06 | R.NLTDAFLAEIEK.V                |
|           |              | 2 | 86 | 1.4e-06 | R.VQQEIDAVIGQVR.H               |
|           |              | 3 | 50 | 0.00025 | R.MPYTNAVIHEVQR.F (M oxidation) |
| Cyp2d9    | gi 74180862  | 2 | 53 | 0.0022  | R.FSVSTLR.N                     |
|           |              | 2 | 24 | 0.85    | R.RFSVSTLR.N                    |
|           |              | 2 | 13 | 0.94    | K.KSLEDWVTK.E                   |
|           |              | 2 | 47 | 0.0012  | R.TTWDPVQAPR.N                  |
|           |              | 2 | 55 | 0.00011 | R.FGDIVPVNLPR.I                 |
|           |              | 2 | 72 | 3.4e-06 | R.NLTDAFLAEIEK.A                |
|           |              | 2 | 73 | 1.4e-05 | R.VQQEIDEVIGQVR.H               |
|           |              | 3 | 21 | 0.26    | R.ITSHDIEVQDFLIPK.G             |
| mEH       | gi 6753762   | 2 | 29 | 0.17    | K.LLAQDIR.K                     |
|           |              | 2 | 5  | 0.097   | K.GLNSVATAR.I                   |
|           |              | 2 | 50 | 0.00039 | R.ASPPLEGSR.F                   |
|           |              | 2 | 23 | 1.5     | K.LLAQDIRK.F                    |
|           |              | 2 | 19 | 0.11    | K.IIPLLTDPK.T                   |
|           |              | 2 | 41 | 0.033   | K.KGLNSVATAR.I                  |
|           |              | 2 | 36 | 0.0038  | K.LISYSYMER.G (M oxidation)     |
|           |              | 2 | 65 | 6.7e-06 | R.NIYSLTPLLQQR.F                |
|           |              | 3 | 21 | 0.063   | K.VFVPTGYSAFPSEILHAPEK.W        |
| IFN       | gi 28261389  | 2 | 13 | 1.4     | R.ALQFQDLIK.M                   |
| GTPase    |              | 2 | 55 | 0.0018  | R.ENLQQAQVR.D                   |
|           |              | 2 | 42 | 0.0012  | K.VIGIVKDEIQSK.S                |
|           |              | 2 | 83 | 1.5e-07 | K.VFGVDDGSLQQVAR.S              |
|           |              | 3 | 23 | 0.12    | R.FIGHEEEDSAPTGVVR.T            |
| 17β-HSD13 | gi 148688291 | 2 | 46 | 0.0032  | R.ALTAELDTLKG.T                 |
|           |              | 2 | 33 | 0.012   | R.SLINGILTNNK.M                 |
|           |              | 3 | 14 | 0.23    | R.IQNIQFEAIVGHK.T               |
| 17β-HSD1  | gi 633242    | 2 | 51 | 0.0052  | R.KIMEFFSLR.Y (M oxidation)     |
|           |              | 2 | 39 | 0.0013  | K.MTQPMIAPYSASK.F (M oxidation) |
| RDH7      | gi 8567342   | 2 | 50 | 0.00098 | R.YSAGWDAK.L                    |
|           |              | 2 | 57 | 0.00067 | R.TNVSNYER.L                    |
|           |              | 2 | 35 | 0.0034  | R.VVNISSSMGR.V                  |
|           |              | 2 | 63 | 0.00032 | K.VAIIEPGGFR.T                  |
|           |              | 2 | 11 | 0.72    | R.TRYAGWDAK.L                   |
|           |              | 2 | 49 | 0.00053 | K.LWDQTSSEVK.E                  |
|           |              | 2 | 20 | 0.23    | R.GRVVNISSSMGR.V                |
|           |              | 2 | 36 | 0.0077  | K.TESIVAATQWVK.E                |

|         |              |   |    |         |                                 |
|---------|--------------|---|----|---------|---------------------------------|
|         |              | 3 | 4  | 6.8     | K.YGVEAFSDSLRR.E                |
|         |              | 3 | 12 | 0.42    | K.EVYDKNFLDSYIK.A               |
| Bdh1    | gij 20071598 | 2 | 38 | 0.0024  | R.VVNISMLGR.M (M oxidation)     |
|         |              | 2 | 67 | 2.6e-06 | K.VSVVEPGNFIAATSLYSER.I         |
| ApoE    | gij 192005   | 2 | 57 | 0.00021 | R.LGPLVEQGR.Q                   |
|         |              | 2 | 36 | 0.047   | R.LQAEIFQAR.L                   |
|         |              | 2 | 6  | 4.3     | R.GRLEEVDGNQAR.D                |
| PGRMC1  | gij 2801793  | 2 | 2  | 1.6     | K.VFDVTK.G                      |
|         |              | 2 | 57 | 8.5e-05 | R.ILMAINGK.V (M oxidation)      |
|         |              | 2 | 11 | 1.9     | R.RDFTPAELR.R                   |
|         |              | 3 | 37 | 0.052   | K.RRDFTPAELR.R                  |
|         |              | 2 | 78 | 1.7e-07 | K.FYGPEGPYGVFAGR.D              |
|         |              | 3 | 26 | 0.017   | R.ILMAINGKVFDVTK.G(M oxidation) |
|         |              | 3 | 41 | 0.00038 | K.IVRGDQPGASGDNDDEPPPLPR.L      |
| Rtn3-4  | gij 16716353 | 2 | 8  | 0.86    | K.LPGIAK.K                      |
|         |              | 2 | 27 | 0.093   | K.SVIQAVQK.S                    |
|         |              | 3 | 56 | 0.0017  | K.TQIDHYVGIAR.D                 |
|         |              | 3 | 57 | 0.00019 | K.YKTQIDHYVGIAR.D               |
|         |              | 3 | 33 | 0.025   | K.SIVEKIQAKLPGIAK.K             |
| Gst Pi  | gij 1576133  | 2 | 49 | 0.00042 | K.FEDGDLTYQSNAIR.H              |
|         |              | 3 | 17 | 0.26    | K.ALPGHLKPFETLLSQNQGGK.A        |
| Mett17b | gij 19354269 | 2 | 18 | 3.1     | R.AFLWQR.V                      |
|         |              | 2 | 16 | 0.53    | R.VLEPTWK.H                     |
|         |              | 2 | 31 | 0.46    | R.ETWKDIER.A                    |
|         |              | 2 | 38 | 0.092   | R.ELFSQIKDLK.G                  |
|         |              | 3 | 7  | 2.3     | R.WLPVGP HIMGK.A (M oxidation)  |

<sup>a</sup>Hsc70, Heat Shock Protein 70 cognate; ACSL5, Long-chain fatty acid-CoA ligase 1; GP78, 78 kDa glucose-regulated protein; FMO5, Dimethylaniline monooxygenase 5; Cyp, cytochrome P450; UGT1, UDP-glucuronosyltransferase, family 1; mEH, Epoxide hydrolase 1, microsomal; IFN GTPase, Interferon- $\gamma$ -induced GTPase; 17 $\beta$ -HSD1, 17 $\beta$ -hydroxysteroid dehydrogenase 13; 11 $\beta$ -HSD, 11 $\beta$ -hydroxysteroid dehydrogenase;..RDH7, Retinol Dehydrogenase 7; bdh1, 3-hydroxybutyrate dehydrogenase, type 1; ApoE, Apolipoprotein E; PGRMC1, Progesterone Receptor Membrane Component; RTN3-4; reticulon-3 isoform 4; GST Pi, Glutathione S-transferase, Class Pi; Mettl7b, methyltransferase-like 7b.
